# Supplementary material for: Identifying Transcriptomic Signatures and Rules for SARS-CoV-2 Infection
Source: Front Cell Dev Biol. 2021 Jan 11;8:627302. doi: 10.3389/fcell.2020.627302 (PMC7829664; doi:10.3389/fcell.2020.627302)
Supplement: Supplementary Table 2 — Performance summary of IFS with different classifiers. [file Table_2.XLSX]

## Sheet: Decision tree
Number of features	ARI patients with other viruses	ARI patients without viral infection	ARI patients infected with SARS-COV-2	ACC	MCC
1	0.6	0.463415	0.451613	0.517094	0.257775
2	0.64	0.609756	0.483871	0.57265	0.349636
3	0.72	0.707317	0.623656	0.679487	0.503496
4	0.76	0.682927	0.623656	0.692308	0.526196
5	0.74	0.804878	0.666667	0.722222	0.575742
6	0.77	0.804878	0.602151	0.709402	0.550622
7	0.77	0.707317	0.688172	0.726496	0.580311
8	0.75	0.731707	0.731183	0.739316	0.600201
9	0.69	0.756098	0.731183	0.717949	0.566027
10	0.67	0.804878	0.731183	0.717949	0.574141
11	0.72	0.756098	0.741935	0.735043	0.600808
12	0.67	0.780488	0.72043	0.709402	0.552689
13	0.74	0.731707	0.741935	0.739316	0.600152
14	0.78	0.780488	0.709677	0.752137	0.620177
15	0.83	0.731707	0.806452	0.803419	0.690844
16	0.81	0.658537	0.72043	0.747863	0.606599
17	0.74	0.707317	0.731183	0.730769	0.586883
18	0.75	0.756098	0.698925	0.730769	0.591353
19	0.79	0.609756	0.763441	0.747863	0.606594
20	0.79	0.658537	0.752688	0.752137	0.617237
21	0.79	0.682927	0.688172	0.730769	0.586812
22	0.75	0.756098	0.698925	0.730769	0.591423
23	0.81	0.780488	0.677419	0.752137	0.623996
24	0.77	0.707317	0.709677	0.735043	0.59142
25	0.85	0.756098	0.752688	0.794872	0.685225
26	0.79	0.682927	0.774194	0.764957	0.632805
27	0.79	0.731707	0.709677	0.747863	0.611378
28	0.76	0.756098	0.731183	0.747863	0.614041
29	0.84	0.682927	0.731183	0.769231	0.642059
30	0.84	0.707317	0.752688	0.782051	0.661139
31	0.77	0.658537	0.688172	0.717949	0.562623
32	0.77	0.682927	0.709677	0.730769	0.586812
33	0.77	0.682927	0.709677	0.730769	0.579971
34	0.82	0.682927	0.698925	0.747863	0.60358
35	0.77	0.658537	0.741935	0.739316	0.592341
36	0.78	0.682927	0.752688	0.752137	0.615217
37	0.78	0.682927	0.763441	0.75641	0.621846
38	0.83	0.682927	0.795699	0.790598	0.668968
39	0.8	0.707317	0.688172	0.739316	0.594114
40	0.81	0.731707	0.795699	0.790598	0.677168
41	0.81	0.731707	0.741935	0.769231	0.640203
42	0.81	0.780488	0.72043	0.769231	0.64681
43	0.8	0.780488	0.774194	0.786325	0.668698
44	0.81	0.634146	0.763441	0.760684	0.625889
45	0.78	0.756098	0.731183	0.75641	0.623732
46	0.79	0.707317	0.806452	0.782051	0.658297
47	0.76	0.731707	0.774194	0.760684	0.624783
48	0.78	0.536585	0.763441	0.730769	0.573098
49	0.77	0.658537	0.784946	0.75641	0.616973
50	0.79	0.731707	0.827957	0.794872	0.677987
51	0.77	0.756098	0.763441	0.764957	0.635285
52	0.78	0.707317	0.741935	0.752137	0.610758
53	0.74	0.780488	0.741935	0.747863	0.607559
54	0.8	0.634146	0.774194	0.760684	0.622911
55	0.79	0.634146	0.72043	0.735043	0.583019
56	0.79	0.609756	0.870968	0.790598	0.667761
57	0.78	0.707317	0.806452	0.777778	0.653707
58	0.75	0.682927	0.817204	0.764957	0.631661
59	0.77	0.707317	0.763441	0.75641	0.623335
60	0.7	0.853659	0.677419	0.717949	0.576386
61	0.8	0.682927	0.774194	0.769231	0.638638
62	0.76	0.682927	0.752688	0.74359	0.597426
63	0.7	0.609756	0.731183	0.696581	0.532784
64	0.76	0.682927	0.806452	0.764957	0.626989
65	0.83	0.780488	0.709677	0.773504	0.65271
66	0.76	0.804878	0.817204	0.790598	0.671868
67	0.83	0.707317	0.827957	0.807692	0.69588
68	0.85	0.682927	0.774194	0.790598	0.667703
69	0.75	0.585366	0.784946	0.735043	0.577155
70	0.79	0.634146	0.795699	0.764957	0.628873
71	0.84	0.731707	0.752688	0.786325	0.664068
72	0.77	0.853659	0.795699	0.794872	0.683278
73	0.78	0.707317	0.806452	0.777778	0.651874
74	0.8	0.756098	0.72043	0.760684	0.634523
75	0.78	0.707317	0.752688	0.75641	0.620911
76	0.83	0.707317	0.752688	0.777778	0.650553
77	0.79	0.780488	0.72043	0.760684	0.628574
78	0.74	0.731707	0.763441	0.747863	0.607283
79	0.79	0.756098	0.752688	0.769231	0.643788
80	0.74	0.804878	0.784946	0.769231	0.642359
81	0.71	0.682927	0.752688	0.722222	0.565307
82	0.75	0.731707	0.741935	0.74359	0.605934
83	0.79	0.658537	0.741935	0.747863	0.606639
84	0.78	0.658537	0.688172	0.722222	0.569316
85	0.78	0.804878	0.731183	0.764957	0.639143
86	0.78	0.731707	0.731183	0.752137	0.609226
87	0.79	0.731707	0.741935	0.760684	0.622023
88	0.76	0.682927	0.698925	0.722222	0.569347
89	0.81	0.707317	0.709677	0.752137	0.611625
90	0.77	0.707317	0.827957	0.782051	0.655845
91	0.8	0.853659	0.752688	0.790598	0.67812
92	0.78	0.731707	0.741935	0.75641	0.618354
93	0.73	0.731707	0.817204	0.764957	0.630755
94	0.78	0.634146	0.731183	0.735043	0.579432
95	0.74	0.756098	0.795699	0.764957	0.636695
96	0.71	0.707317	0.741935	0.722222	0.566502
97	0.76	0.804878	0.741935	0.760684	0.627189
98	0.72	0.707317	0.774194	0.739316	0.59969
99	0.73	0.756098	0.688172	0.717949	0.561648
100	0.78	0.707317	0.763441	0.760684	0.622721
101	0.73	0.731707	0.741935	0.735043	0.586471
102	0.78	0.682927	0.774194	0.760684	0.624451
103	0.79	0.804878	0.666667	0.74359	0.602778
104	0.78	0.756098	0.752688	0.764957	0.636182
105	0.79	0.707317	0.806452	0.782051	0.659286
106	0.8	0.707317	0.72043	0.752137	0.615128
107	0.75	0.853659	0.666667	0.735043	0.594608
108	0.79	0.756098	0.817204	0.794872	0.68052
109	0.77	0.682927	0.763441	0.752137	0.616087
110	0.76	0.682927	0.741935	0.739316	0.593179
111	0.74	0.780488	0.677419	0.722222	0.577186
112	0.73	0.756098	0.72043	0.730769	0.582605
113	0.83	0.804878	0.698925	0.773504	0.650747
114	0.74	0.756098	0.709677	0.730769	0.587916
115	0.76	0.780488	0.752688	0.760684	0.629498
116	0.76	0.756098	0.72043	0.74359	0.603697
117	0.81	0.780488	0.731183	0.773504	0.649551
118	0.81	0.829268	0.72043	0.777778	0.664655
119	0.73	0.756098	0.731183	0.735043	0.597331
120	0.81	0.731707	0.72043	0.760684	0.633786
121	0.75	0.634146	0.752688	0.730769	0.581308
122	0.82	0.731707	0.731183	0.769231	0.6378
123	0.73	0.780488	0.709677	0.730769	0.590188
124	0.77	0.707317	0.698925	0.730769	0.575436
125	0.7	0.682927	0.655914	0.679487	0.508017
126	0.76	0.756098	0.709677	0.739316	0.6047
127	0.72	0.756098	0.698925	0.717949	0.565729
128	0.81	0.829268	0.688172	0.764957	0.642779
129	0.77	0.682927	0.806452	0.769231	0.639406
130	0.8	0.804878	0.784946	0.794872	0.683135
131	0.71	0.707317	0.677419	0.696581	0.532954
132	0.77	0.853659	0.763441	0.782051	0.665898
133	0.76	0.829268	0.774194	0.777778	0.660451
134	0.8	0.756098	0.741935	0.769231	0.63854
135	0.75	0.731707	0.731183	0.739316	0.597016
136	0.76	0.634146	0.741935	0.730769	0.573309
137	0.77	0.634146	0.784946	0.752137	0.611893
138	0.72	0.756098	0.752688	0.739316	0.598624
139	0.76	0.682927	0.72043	0.730769	0.578301
140	0.78	0.682927	0.763441	0.75641	0.617724
141	0.76	0.780488	0.709677	0.74359	0.601854
142	0.73	0.780488	0.709677	0.730769	0.583862
143	0.8	0.585366	0.688172	0.717949	0.562794
144	0.77	0.780488	0.688172	0.739316	0.600567
145	0.73	0.756098	0.655914	0.705128	0.552963
146	0.81	0.780488	0.709677	0.764957	0.641602
147	0.79	0.756098	0.72043	0.75641	0.620903
148	0.76	0.780488	0.677419	0.730769	0.584681
149	0.78	0.707317	0.655914	0.717949	0.567175
150	0.82	0.658537	0.752688	0.764957	0.628765
151	0.78	0.829268	0.709677	0.760684	0.63345
152	0.77	0.707317	0.688172	0.726496	0.575955
153	0.79	0.707317	0.741935	0.75641	0.61593
154	0.77	0.804878	0.741935	0.764957	0.640112
155	0.76	0.756098	0.666667	0.722222	0.573854
156	0.78	0.707317	0.763441	0.760684	0.631633
157	0.71	0.609756	0.709677	0.692308	0.530926
158	0.75	0.658537	0.709677	0.717949	0.563732
159	0.82	0.780488	0.698925	0.764957	0.642779
160	0.8	0.731707	0.806452	0.790598	0.669692
161	0.77	0.707317	0.709677	0.735043	0.593623
162	0.79	0.731707	0.666667	0.730769	0.581089
163	0.73	0.829268	0.709677	0.739316	0.60123
164	0.84	0.853659	0.731183	0.799145	0.687642
165	0.72	0.658537	0.677419	0.692308	0.528066
166	0.77	0.707317	0.645161	0.709402	0.553401
167	0.75	0.634146	0.741935	0.726496	0.569502
168	0.79	0.756098	0.731183	0.760684	0.629548
169	0.76	0.756098	0.688172	0.730769	0.58583
170	0.77	0.682927	0.731183	0.739316	0.592341
171	0.76	0.780488	0.698925	0.739316	0.607032
172	0.76	0.731707	0.709677	0.735043	0.594574
173	0.72	0.804878	0.645161	0.705128	0.556534
174	0.77	0.731707	0.752688	0.75641	0.620095
175	0.79	0.731707	0.666667	0.730769	0.587065
176	0.75	0.682927	0.677419	0.709402	0.547189
177	0.76	0.682927	0.677419	0.713675	0.555931
178	0.77	0.731707	0.72043	0.74359	0.608077
179	0.8	0.658537	0.72043	0.74359	0.599889

## Sheet: K-nearest neighbor
Number of features	ARI patients with other viruses	ARI patients without viral infection	ARI patients infected with SARS-COV-2	ACC	MCC
1	0.59	0.487805	0.408602	0.5	0.241119
2	0.68	0.780488	0.55914	0.649573	0.463914
3	0.63	0.731707	0.666667	0.662393	0.482015
4	0.65	0.731707	0.634409	0.65812	0.487224
5	0.69	0.780488	0.709677	0.713675	0.566118
6	0.65	0.853659	0.763441	0.730769	0.596497
7	0.74	0.804878	0.795699	0.773504	0.652436
8	0.77	0.902439	0.795699	0.803419	0.704345
9	0.79	0.95122	0.774194	0.811966	0.714382
10	0.74	0.902439	0.817204	0.799145	0.69795
11	0.74	0.829268	0.806452	0.782051	0.668936
12	0.75	0.878049	0.817204	0.799145	0.69795
13	0.77	0.902439	0.817204	0.811966	0.713016
14	0.75	0.878049	0.774194	0.782051	0.670215
15	0.76	0.926829	0.784946	0.799145	0.695785
16	0.78	0.902439	0.784946	0.803419	0.703298
17	0.77	0.878049	0.741935	0.777778	0.664417
18	0.72	0.95122	0.774194	0.782051	0.684206
19	0.73	0.926829	0.774194	0.782051	0.67718
20	0.77	0.902439	0.741935	0.782051	0.673399
21	0.81	0.926829	0.763441	0.811966	0.716463
22	0.73	0.829268	0.784946	0.769231	0.650654
23	0.78	0.95122	0.763441	0.803419	0.703298
24	0.75	0.902439	0.741935	0.773504	0.660315
25	0.75	0.926829	0.784946	0.794872	0.689319
26	0.82	0.902439	0.774194	0.816239	0.720059
27	0.82	0.926829	0.774194	0.820513	0.72484
28	0.81	0.829268	0.741935	0.786325	0.674472
29	0.8	0.902439	0.752688	0.799145	0.699921
30	0.81	0.878049	0.741935	0.794872	0.688815
31	0.84	0.95122	0.731183	0.816239	0.724204
32	0.81	0.878049	0.774194	0.807692	0.708771
33	0.8	0.804878	0.795699	0.799145	0.69359
34	0.8	0.902439	0.795699	0.816239	0.7235
35	0.85	0.878049	0.817204	0.84188	0.754956
36	0.83	0.926829	0.806452	0.837607	0.752628
37	0.8	0.926829	0.806452	0.824786	0.734574
38	0.83	0.853659	0.795699	0.820513	0.723959
39	0.84	1	0.763441	0.837607	0.757416
40	0.84	0.97561	0.774194	0.837607	0.754307
41	0.84	0.878049	0.784946	0.824786	0.73156
42	0.8	0.780488	0.784946	0.790598	0.677436
43	0.79	0.926829	0.817204	0.824786	0.739147
44	0.81	0.780488	0.774194	0.790598	0.680173
45	0.83	0.829268	0.784946	0.811966	0.711652
46	0.8	0.878049	0.774194	0.803419	0.705429
47	0.82	0.95122	0.795699	0.833333	0.751866
48	0.83	0.902439	0.752688	0.811966	0.714382
49	0.79	0.926829	0.752688	0.799145	0.70108
50	0.81	0.853659	0.752688	0.794872	0.686765
51	0.79	0.902439	0.741935	0.790598	0.686643
52	0.82	0.878049	0.731183	0.794872	0.691425
53	0.8	0.926829	0.752688	0.803419	0.704426
54	0.81	0.902439	0.741935	0.799145	0.697778
55	0.81	0.902439	0.752688	0.803419	0.703395
56	0.81	0.878049	0.752688	0.799145	0.697619
57	0.83	0.95122	0.763441	0.824786	0.736401
58	0.8	0.926829	0.741935	0.799145	0.70356
59	0.83	0.878049	0.752688	0.807692	0.708114
60	0.84	0.878049	0.752688	0.811966	0.715723
61	0.74	0.878049	0.731183	0.760684	0.641415
62	0.77	0.853659	0.688172	0.752137	0.631263
63	0.74	0.829268	0.741935	0.75641	0.633569
64	0.73	0.926829	0.72043	0.760684	0.647872
65	0.74	0.95122	0.741935	0.777778	0.669261
66	0.75	0.902439	0.688172	0.752137	0.630926
67	0.71	0.804878	0.774194	0.752137	0.623893
68	0.71	0.95122	0.741935	0.764957	0.660144
69	0.74	0.878049	0.731183	0.760684	0.64266
70	0.75	0.853659	0.731183	0.760684	0.641436
71	0.74	0.902439	0.731183	0.764957	0.650561
72	0.75	0.902439	0.731183	0.769231	0.657165
73	0.72	0.97561	0.752688	0.777778	0.670561
74	0.77	0.829268	0.731183	0.764957	0.641166
75	0.77	0.853659	0.731183	0.769231	0.650021
76	0.76	0.804878	0.752688	0.764957	0.639093
77	0.75	0.95122	0.752688	0.786325	0.683798
78	0.75	0.95122	0.752688	0.786325	0.683713
79	0.71	0.853659	0.731183	0.74359	0.614925
80	0.71	0.902439	0.763441	0.764957	0.648696
81	0.74	0.95122	0.752688	0.782051	0.674623
82	0.7	0.804878	0.752688	0.739316	0.606315
83	0.71	0.926829	0.709677	0.747863	0.628151
84	0.75	0.853659	0.741935	0.764957	0.642293
85	0.73	0.878049	0.731183	0.75641	0.633615
86	0.67	0.902439	0.709677	0.726496	0.596433
87	0.7	0.902439	0.72043	0.74359	0.621539
88	0.64	0.829268	0.774194	0.726496	0.595764
89	0.67	0.926829	0.741935	0.74359	0.623689
90	0.7	0.829268	0.72043	0.730769	0.596534
91	0.66	0.878049	0.741935	0.730769	0.603634
92	0.68	0.926829	0.709677	0.735043	0.613856
93	0.68	0.878049	0.741935	0.739316	0.618148
94	0.71	0.829268	0.752688	0.747863	0.620545
95	0.71	0.878049	0.731183	0.747863	0.626854
96	0.74	0.878049	0.731183	0.760684	0.640207
97	0.73	0.878049	0.709677	0.747863	0.628074
98	0.71	0.878049	0.741935	0.752137	0.629528
99	0.73	0.902439	0.741935	0.764957	0.653216
100	0.71	0.926829	0.763441	0.769231	0.662105
101	0.75	0.878049	0.741935	0.769231	0.657182
102	0.73	0.878049	0.741935	0.760684	0.646602
103	0.76	0.804878	0.752688	0.764957	0.644496
104	0.73	0.902439	0.741935	0.764957	0.653216
105	0.72	0.926829	0.763441	0.773504	0.666532
106	0.7	0.853659	0.741935	0.74359	0.623259
107	0.71	0.853659	0.741935	0.747863	0.625737
108	0.75	0.878049	0.72043	0.760684	0.645213
109	0.72	0.853659	0.752688	0.75641	0.637597
110	0.69	0.902439	0.731183	0.74359	0.628847
111	0.74	0.853659	0.763441	0.769231	0.65496
112	0.74	0.926829	0.741935	0.773504	0.666444
113	0.7	0.829268	0.72043	0.730769	0.601706
114	0.77	0.829268	0.752688	0.773504	0.657778
115	0.71	0.878049	0.709677	0.739316	0.619091
116	0.74	0.878049	0.709677	0.752137	0.633291
117	0.71	0.902439	0.741935	0.75641	0.638821
118	0.75	0.878049	0.72043	0.760684	0.645254
119	0.72	0.95122	0.72043	0.760684	0.653538
120	0.77	0.853659	0.741935	0.773504	0.660138
121	0.7	0.853659	0.731183	0.739316	0.613922
122	0.74	0.804878	0.72043	0.74359	0.618739
123	0.72	0.829268	0.752688	0.752137	0.629966
124	0.76	0.95122	0.72043	0.777778	0.675688
125	0.72	0.926829	0.731183	0.760684	0.650745
126	0.71	0.95122	0.688172	0.74359	0.631594
127	0.75	0.853659	0.698925	0.747863	0.628023
128	0.71	0.902439	0.709677	0.74359	0.628565
129	0.74	0.878049	0.731183	0.760684	0.642699
130	0.75	0.829268	0.731183	0.75641	0.634785
131	0.73	0.926829	0.731183	0.764957	0.65746
132	0.67	0.926829	0.731183	0.739316	0.618611
133	0.71	0.95122	0.72043	0.75641	0.646932
134	0.75	0.853659	0.698925	0.747863	0.624102
135	0.7	0.902439	0.72043	0.74359	0.625921
136	0.75	0.878049	0.72043	0.760684	0.643934
137	0.75	0.829268	0.752688	0.764957	0.645669
138	0.71	0.829268	0.731183	0.739316	0.613628
139	0.75	0.878049	0.72043	0.760684	0.64394
140	0.76	0.878049	0.709677	0.760684	0.646526
141	0.74	0.853659	0.72043	0.752137	0.630673
142	0.73	0.878049	0.72043	0.752137	0.632019
143	0.76	0.902439	0.731183	0.773504	0.662569
144	0.73	0.756098	0.752688	0.74359	0.605109
145	0.73	0.902439	0.72043	0.75641	0.641299
146	0.75	0.926829	0.72043	0.769231	0.658455
147	0.72	0.902439	0.709677	0.747863	0.629481
148	0.72	0.902439	0.752688	0.764957	0.653306
149	0.69	0.902439	0.698925	0.730769	0.610279
150	0.69	0.902439	0.741935	0.747863	0.633119
151	0.74	0.878049	0.72043	0.75641	0.636035
152	0.68	0.926829	0.752688	0.752137	0.636905
153	0.76	0.804878	0.72043	0.752137	0.625747
154	0.74	0.780488	0.72043	0.739316	0.609542
155	0.74	0.829268	0.731183	0.752137	0.630673
156	0.69	0.878049	0.731183	0.739316	0.617967
157	0.74	0.853659	0.731183	0.75641	0.636035
158	0.72	0.853659	0.752688	0.75641	0.637376
159	0.79	0.829268	0.763441	0.786325	0.67347
160	0.75	0.853659	0.741935	0.764957	0.650561
161	0.76	0.878049	0.741935	0.773504	0.663803
162	0.74	0.878049	0.72043	0.75641	0.641256
163	0.74	0.902439	0.752688	0.773504	0.662639
164	0.72	0.902439	0.774194	0.773504	0.668246
165	0.71	0.902439	0.763441	0.764957	0.654847
166	0.71	0.926829	0.784946	0.777778	0.676553
167	0.69	0.878049	0.795699	0.764957	0.653131
168	0.69	0.95122	0.752688	0.760684	0.655419
169	0.68	0.829268	0.731183	0.726496	0.598001
170	0.72	0.95122	0.731183	0.764957	0.660322
171	0.72	0.902439	0.709677	0.747863	0.632304
172	0.72	0.95122	0.731183	0.764957	0.660215
173	0.71	0.878049	0.752688	0.75641	0.640207
174	0.71	0.95122	0.72043	0.75641	0.649978
175	0.69	0.829268	0.72043	0.726496	0.600888
176	0.69	0.902439	0.741935	0.747863	0.633907
177	0.69	0.95122	0.731183	0.752137	0.645078
178	0.73	0.878049	0.731183	0.75641	0.641299
179	0.7	0.756098	0.784946	0.74359	0.614993

## Sheet: Random forest
Number of features	ARI patients with other viruses	ARI patients without viral infection	ARI patients infected with SARS-COV-2	ACC	MCC
1	0.58	0.536585	0.430108	0.512821	0.264387
2	0.66	0.731707	0.602151	0.649573	0.458818
3	0.75	0.829268	0.72043	0.752137	0.617061
4	0.8	0.780488	0.709677	0.760684	0.627801
5	0.79	0.829268	0.72043	0.769231	0.643841
6	0.85	0.853659	0.774194	0.820513	0.720063
7	0.91	0.902439	0.849462	0.884615	0.81892
8	0.89	0.878049	0.817204	0.858974	0.778804
9	0.87	0.878049	0.806452	0.846154	0.760272
10	0.86	0.804878	0.849462	0.846154	0.757669
11	0.85	0.829268	0.903226	0.867521	0.791709
12	0.84	0.853659	0.827957	0.837607	0.746145
13	0.85	0.878049	0.860215	0.858974	0.778658
14	0.88	0.853659	0.870968	0.871795	0.79867
15	0.89	0.829268	0.83871	0.858974	0.778539
16	0.84	0.853659	0.870968	0.854701	0.773728
17	0.84	0.853659	0.88172	0.858974	0.780573
18	0.85	0.878049	0.860215	0.858974	0.780348
19	0.85	0.878049	0.849462	0.854701	0.772927
20	0.83	0.878049	0.870968	0.854701	0.773292
21	0.87	0.902439	0.870968	0.876068	0.805999
22	0.84	0.878049	0.88172	0.863248	0.785751
23	0.86	0.878049	0.870968	0.867521	0.791538
24	0.88	0.853659	0.870968	0.871795	0.797682
25	0.88	0.853659	0.903226	0.884615	0.817769
26	0.86	0.804878	0.88172	0.858974	0.777051
27	0.88	0.878049	0.892473	0.884615	0.818963
28	0.84	0.926829	0.870968	0.867521	0.794741
29	0.85	0.853659	0.903226	0.871795	0.79902
30	0.86	0.853659	0.892473	0.871795	0.798864
31	0.87	0.878049	0.892473	0.880342	0.813445
32	0.86	0.878049	0.892473	0.876068	0.806086
33	0.86	0.902439	0.870968	0.871795	0.799833
34	0.85	0.926829	0.903226	0.884615	0.820519
35	0.87	0.878049	0.88172	0.876068	0.806536
36	0.87	0.926829	0.860215	0.876068	0.80854
37	0.84	0.878049	0.849462	0.850427	0.767591
38	0.85	0.902439	0.88172	0.871795	0.800164
39	0.85	0.878049	0.860215	0.858974	0.779672
40	0.86	0.902439	0.849462	0.863248	0.787704
41	0.85	0.878049	0.83871	0.850427	0.767591
42	0.83	0.902439	0.88172	0.863248	0.787462
43	0.87	0.878049	0.860215	0.867521	0.792501
44	0.86	0.878049	0.870968	0.867521	0.793113
45	0.86	0.902439	0.83871	0.858974	0.780996
46	0.84	0.878049	0.860215	0.854701	0.773728
47	0.87	0.902439	0.870968	0.876068	0.807799
48	0.84	0.878049	0.88172	0.863248	0.78646
49	0.83	0.878049	0.870968	0.854701	0.772079
50	0.87	0.902439	0.849462	0.867521	0.793776
51	0.87	0.853659	0.88172	0.871795	0.798195
52	0.87	0.878049	0.849462	0.863248	0.787149
53	0.88	0.878049	0.860215	0.871795	0.798207
54	0.85	0.902439	0.849462	0.858974	0.780976
55	0.84	0.926829	0.860215	0.863248	0.788437
56	0.86	0.926829	0.860215	0.871795	0.800444
57	0.85	0.902439	0.849462	0.858974	0.780302
58	0.86	0.926829	0.88172	0.880342	0.813906
59	0.89	0.902439	0.870968	0.884615	0.817936
60	0.85	0.902439	0.849462	0.858974	0.7803
61	0.83	0.829268	0.860215	0.84188	0.751715
62	0.84	0.853659	0.860215	0.850427	0.766925
63	0.86	0.853659	0.860215	0.858974	0.779041
64	0.85	0.853659	0.870968	0.858974	0.779087
65	0.84	0.853659	0.870968	0.854701	0.771808
66	0.88	0.853659	0.870968	0.871795	0.798157
67	0.84	0.853659	0.88172	0.858974	0.778658
68	0.83	0.853659	0.870968	0.850427	0.765723
69	0.84	0.853659	0.849462	0.846154	0.760858
70	0.9	0.853659	0.870968	0.880342	0.810156
71	0.87	0.853659	0.849462	0.858974	0.779039
72	0.86	0.878049	0.860215	0.863248	0.78577
73	0.86	0.878049	0.860215	0.863248	0.786393
74	0.88	0.878049	0.860215	0.871795	0.798302
75	0.89	0.878049	0.860215	0.876068	0.806112
76	0.85	0.878049	0.88172	0.867521	0.791952
77	0.87	0.878049	0.870968	0.871795	0.799233
78	0.88	0.878049	0.849462	0.867521	0.792141
79	0.85	0.878049	0.870968	0.863248	0.78706
80	0.9	0.878049	0.892473	0.893162	0.831903
81	0.85	0.878049	0.88172	0.867521	0.793771
82	0.9	0.878049	0.870968	0.884615	0.819125
83	0.86	0.878049	0.870968	0.867521	0.793092
84	0.85	0.878049	0.892473	0.871795	0.798864
85	0.9	0.878049	0.870968	0.884615	0.818175
86	0.87	0.878049	0.88172	0.876068	0.805964
87	0.85	0.853659	0.860215	0.854701	0.771714
88	0.85	0.853659	0.892473	0.867521	0.792944
89	0.86	0.878049	0.88172	0.871795	0.798754
90	0.87	0.853659	0.88172	0.871795	0.798689
91	0.86	0.829268	0.892473	0.867521	0.791103
92	0.86	0.829268	0.88172	0.863248	0.783816
93	0.88	0.878049	0.870968	0.876068	0.805964
94	0.85	0.829268	0.892473	0.863248	0.78555
95	0.86	0.878049	0.892473	0.876068	0.8056
96	0.86	0.853659	0.870968	0.863248	0.784793
97	0.87	0.853659	0.860215	0.863248	0.785815
98	0.87	0.853659	0.88172	0.871795	0.798153
99	0.86	0.829268	0.892473	0.867521	0.790214
100	0.85	0.829268	0.88172	0.858974	0.776961
101	0.85	0.804878	0.870968	0.850427	0.764086
102	0.86	0.853659	0.83871	0.850427	0.766282
103	0.86	0.878049	0.860215	0.863248	0.78577
104	0.85	0.829268	0.892473	0.863248	0.785393
105	0.86	0.829268	0.892473	0.867521	0.790992
106	0.88	0.853659	0.903226	0.884615	0.818011
107	0.87	0.853659	0.88172	0.871795	0.79867
108	0.86	0.853659	0.892473	0.871795	0.798283
109	0.87	0.829268	0.892473	0.871795	0.797682
110	0.88	0.853659	0.870968	0.871795	0.797663
111	0.87	0.829268	0.892473	0.871795	0.796813
112	0.87	0.853659	0.88172	0.871795	0.798689
113	0.86	0.853659	0.870968	0.863248	0.784658
114	0.88	0.853659	0.892473	0.880342	0.811687
115	0.89	0.853659	0.860215	0.871795	0.797269
116	0.87	0.853659	0.88172	0.871795	0.798195
117	0.85	0.853659	0.88172	0.863248	0.785904
118	0.88	0.878049	0.870968	0.876068	0.805409
119	0.88	0.829268	0.903226	0.880342	0.810365
120	0.87	0.853659	0.892473	0.876068	0.8056
121	0.88	0.878049	0.892473	0.884615	0.818433
122	0.86	0.853659	0.88172	0.867521	0.791952
123	0.89	0.853659	0.88172	0.880342	0.811209
124	0.89	0.853659	0.903226	0.888889	0.824317
125	0.87	0.878049	0.892473	0.880342	0.811365
126	0.89	0.853659	0.892473	0.884615	0.817515
127	0.88	0.853659	0.870968	0.871795	0.79867
128	0.88	0.853659	0.870968	0.871795	0.797663
129	0.88	0.878049	0.88172	0.880342	0.811648
130	0.89	0.853659	0.88172	0.880342	0.811648
131	0.88	0.853659	0.88172	0.876068	0.804901
132	0.87	0.853659	0.860215	0.863248	0.78577
133	0.86	0.853659	0.903226	0.876068	0.80516
134	0.89	0.853659	0.870968	0.876068	0.804449
135	0.87	0.853659	0.870968	0.867521	0.791952
136	0.88	0.853659	0.88172	0.876068	0.804421
137	0.85	0.853659	0.892473	0.867521	0.792129
138	0.89	0.853659	0.892473	0.884615	0.818395
139	0.86	0.853659	0.860215	0.858974	0.779087
140	0.87	0.853659	0.88172	0.871795	0.799229
141	0.88	0.853659	0.870968	0.871795	0.79867
142	0.87	0.853659	0.892473	0.876068	0.804502
143	0.88	0.853659	0.892473	0.880342	0.810748
144	0.88	0.829268	0.870968	0.867521	0.790905
145	0.88	0.829268	0.860215	0.863248	0.785215
146	0.87	0.853659	0.870968	0.867521	0.791406
147	0.86	0.853659	0.892473	0.871795	0.797747
148	0.87	0.878049	0.903226	0.884615	0.818518
149	0.86	0.829268	0.88172	0.863248	0.784349
150	0.87	0.829268	0.870968	0.863248	0.784148
151	0.89	0.853659	0.892473	0.884615	0.817936
152	0.87	0.853659	0.88172	0.871795	0.798689
153	0.89	0.853659	0.860215	0.871795	0.798697
154	0.89	0.853659	0.88172	0.880342	0.812148
155	0.86	0.853659	0.870968	0.863248	0.787015
156	0.88	0.853659	0.860215	0.867521	0.791408
157	0.89	0.878049	0.88172	0.884615	0.818395
158	0.9	0.853659	0.88172	0.884615	0.817241
159	0.87	0.853659	0.870968	0.867521	0.791952
160	0.88	0.853659	0.870968	0.871795	0.79867
161	0.87	0.853659	0.870968	0.867521	0.790451
162	0.88	0.853659	0.860215	0.867521	0.791956
163	0.91	0.853659	0.860215	0.880342	0.811957
164	0.9	0.829268	0.870968	0.876068	0.804449
165	0.86	0.853659	0.892473	0.871795	0.797344
166	0.9	0.853659	0.892473	0.888889	0.823576
167	0.86	0.853659	0.88172	0.867521	0.792018
168	0.87	0.829268	0.83871	0.850427	0.765052
169	0.87	0.853659	0.892473	0.876068	0.804502
170	0.92	0.853659	0.860215	0.884615	0.818175
171	0.86	0.853659	0.88172	0.867521	0.792631
172	0.89	0.853659	0.860215	0.871795	0.798207
173	0.87	0.853659	0.860215	0.863248	0.784659
174	0.87	0.853659	0.870968	0.867521	0.791931
175	0.88	0.853659	0.870968	0.871795	0.79867
176	0.87	0.853659	0.870968	0.867521	0.791952
177	0.87	0.853659	0.892473	0.876068	0.80549
178	0.87	0.853659	0.88172	0.871795	0.798689
179	0.89	0.853659	0.870968	0.876068	0.806015

## Sheet: Support vector machine
Number of features	ARI patients with other viruses	ARI patients without viral infection	ARI patients infected with SARS-COV-2	ACC	MCC
1	0.8	0.439024	0.225806	0.508547	0.266837
2	0.72	0.682927	0.290323	0.542735	0.334323
3	0.74	0.682927	0.548387	0.653846	0.487459
4	0.73	0.658537	0.645161	0.683761	0.523744
5	0.79	0.682927	0.612903	0.700855	0.550977
6	0.81	0.609756	0.72043	0.739316	0.592359
7	0.83	0.634146	0.752688	0.764957	0.632877
8	0.85	0.658537	0.741935	0.773504	0.647056
9	0.87	0.634146	0.763441	0.786325	0.664121
10	0.83	0.609756	0.795699	0.777778	0.647303
11	0.84	0.609756	0.784946	0.777778	0.646967
12	0.85	0.585366	0.795699	0.782051	0.652988
13	0.85	0.585366	0.83871	0.799145	0.679994
14	0.87	0.585366	0.817204	0.799145	0.68105
15	0.87	0.585366	0.817204	0.799145	0.680451
16	0.87	0.585366	0.795699	0.790598	0.667907
17	0.87	0.585366	0.83871	0.807692	0.694102
18	0.87	0.585366	0.83871	0.807692	0.694102
19	0.86	0.585366	0.83871	0.803419	0.687098
20	0.86	0.585366	0.849462	0.807692	0.693779
21	0.87	0.585366	0.849462	0.811966	0.700231
22	0.87	0.585366	0.849462	0.811966	0.700231
23	0.86	0.585366	0.860215	0.811966	0.700107
24	0.88	0.585366	0.860215	0.820513	0.713597
25	0.88	0.585366	0.860215	0.820513	0.713597
26	0.9	0.585366	0.83871	0.820513	0.713233
27	0.9	0.585366	0.860215	0.82906	0.726523
28	0.93	0.609756	0.870968	0.850427	0.760682
29	0.93	0.609756	0.849462	0.84188	0.747687
30	0.92	0.609756	0.860215	0.84188	0.747418
31	0.92	0.609756	0.860215	0.84188	0.747418
32	0.92	0.634146	0.903226	0.863248	0.780915
33	0.92	0.634146	0.903226	0.863248	0.780915
34	0.92	0.634146	0.903226	0.863248	0.781046
35	0.9	0.658537	0.892473	0.854701	0.767747
36	0.89	0.658537	0.860215	0.837607	0.74151
37	0.89	0.658537	0.870968	0.84188	0.747804
38	0.89	0.658537	0.860215	0.837607	0.741389
39	0.88	0.658537	0.88172	0.84188	0.747731
40	0.88	0.682927	0.860215	0.837607	0.741842
41	0.87	0.707317	0.870968	0.84188	0.748489
42	0.87	0.707317	0.870968	0.84188	0.748898
43	0.87	0.707317	0.849462	0.833333	0.736335
44	0.88	0.707317	0.870968	0.846154	0.75535
45	0.88	0.731707	0.860215	0.846154	0.755807
46	0.88	0.707317	0.870968	0.846154	0.75535
47	0.88	0.707317	0.860215	0.84188	0.748648
48	0.88	0.682927	0.849462	0.833333	0.735175
49	0.88	0.682927	0.849462	0.833333	0.735175
50	0.88	0.682927	0.860215	0.837607	0.742219
51	0.87	0.731707	0.860215	0.84188	0.750429
52	0.87	0.731707	0.849462	0.837607	0.744272
53	0.87	0.682927	0.870968	0.837607	0.742586
54	0.87	0.682927	0.849462	0.82906	0.729635
55	0.87	0.682927	0.849462	0.82906	0.729635
56	0.87	0.731707	0.860215	0.84188	0.750529
57	0.87	0.731707	0.849462	0.837607	0.743905
58	0.89	0.731707	0.860215	0.850427	0.763092
59	0.89	0.731707	0.870968	0.854701	0.769768
60	0.89	0.731707	0.849462	0.846154	0.756852
61	0.89	0.731707	0.860215	0.850427	0.763417
62	0.89	0.731707	0.870968	0.854701	0.769704
63	0.89	0.731707	0.860215	0.850427	0.763092
64	0.89	0.731707	0.860215	0.850427	0.7635
65	0.89	0.731707	0.860215	0.850427	0.7635
66	0.89	0.731707	0.827957	0.837607	0.743462
67	0.88	0.731707	0.817204	0.82906	0.730545
68	0.89	0.731707	0.817204	0.833333	0.737539
69	0.88	0.756098	0.827957	0.837607	0.744551
70	0.88	0.756098	0.827957	0.837607	0.744088
71	0.88	0.756098	0.83871	0.84188	0.750672
72	0.88	0.756098	0.817204	0.833333	0.737539
73	0.89	0.780488	0.817204	0.84188	0.752222
74	0.89	0.780488	0.817204	0.84188	0.752222
75	0.9	0.780488	0.817204	0.846154	0.759256
76	0.91	0.756098	0.817204	0.846154	0.758539
77	0.91	0.756098	0.817204	0.846154	0.758539
78	0.91	0.780488	0.806452	0.846154	0.759578
79	0.9	0.756098	0.806452	0.837607	0.745004
80	0.9	0.756098	0.806452	0.837607	0.745735
81	0.91	0.756098	0.806452	0.84188	0.751364
82	0.91	0.756098	0.83871	0.854701	0.770976
83	0.9	0.756098	0.827957	0.846154	0.758556
84	0.9	0.756098	0.827957	0.846154	0.758071
85	0.89	0.756098	0.817204	0.837607	0.745004
86	0.9	0.756098	0.817204	0.84188	0.751771
87	0.91	0.756098	0.817204	0.846154	0.758144
88	0.91	0.756098	0.817204	0.846154	0.757793
89	0.9	0.756098	0.817204	0.84188	0.751364
90	0.9	0.756098	0.827957	0.846154	0.758283
91	0.9	0.780488	0.827957	0.850427	0.765498
92	0.9	0.780488	0.83871	0.854701	0.772055
93	0.9	0.780488	0.83871	0.854701	0.772055
94	0.9	0.756098	0.827957	0.846154	0.758283
95	0.9	0.780488	0.827957	0.850427	0.765735
96	0.9	0.756098	0.827957	0.846154	0.758283
97	0.9	0.780488	0.827957	0.850427	0.765498
98	0.9	0.804878	0.817204	0.850427	0.766467
99	0.9	0.804878	0.817204	0.850427	0.766467
100	0.9	0.804878	0.817204	0.850427	0.766467
101	0.9	0.780488	0.817204	0.846154	0.758979
102	0.9	0.780488	0.817204	0.846154	0.758979
103	0.91	0.780488	0.817204	0.850427	0.765307
104	0.91	0.780488	0.817204	0.850427	0.765498
105	0.91	0.780488	0.827957	0.854701	0.771591
106	0.9	0.780488	0.827957	0.850427	0.765305
107	0.9	0.780488	0.827957	0.850427	0.765305
108	0.91	0.804878	0.83871	0.863248	0.785111
109	0.92	0.804878	0.83871	0.867521	0.791487
110	0.92	0.804878	0.83871	0.867521	0.791487
111	0.92	0.804878	0.83871	0.867521	0.791487
112	0.92	0.829268	0.83871	0.871795	0.798865
113	0.92	0.829268	0.83871	0.871795	0.798865
114	0.92	0.829268	0.83871	0.871795	0.799518
115	0.92	0.829268	0.83871	0.871795	0.799518
116	0.92	0.829268	0.83871	0.871795	0.799518
117	0.92	0.829268	0.83871	0.871795	0.799518
118	0.92	0.804878	0.849462	0.871795	0.798047
119	0.92	0.804878	0.849462	0.871795	0.798258
120	0.91	0.829268	0.860215	0.876068	0.805633
121	0.91	0.804878	0.849462	0.867521	0.791871
122	0.91	0.804878	0.849462	0.867521	0.791871
123	0.91	0.804878	0.849462	0.867521	0.791687
124	0.91	0.804878	0.849462	0.867521	0.791687
125	0.91	0.829268	0.83871	0.867521	0.793191
126	0.91	0.829268	0.849462	0.871795	0.799704
127	0.91	0.829268	0.849462	0.871795	0.799704
128	0.91	0.853659	0.849462	0.876068	0.806925
129	0.91	0.829268	0.849462	0.871795	0.799517
130	0.91	0.878049	0.849462	0.880342	0.814364
131	0.91	0.878049	0.849462	0.880342	0.814364
132	0.92	0.853659	0.849462	0.880342	0.813428
133	0.92	0.829268	0.849462	0.876068	0.806014
134	0.92	0.829268	0.849462	0.876068	0.806014
135	0.92	0.829268	0.849462	0.876068	0.806014
136	0.92	0.829268	0.849462	0.876068	0.806014
137	0.92	0.829268	0.849462	0.876068	0.806014
138	0.92	0.829268	0.849462	0.876068	0.806014
139	0.92	0.829268	0.849462	0.876068	0.806014
140	0.92	0.878049	0.849462	0.884615	0.820608
141	0.91	0.853659	0.83871	0.871795	0.800657
142	0.91	0.853659	0.83871	0.871795	0.800657
143	0.91	0.853659	0.83871	0.871795	0.800657
144	0.91	0.878049	0.83871	0.876068	0.807874
145	0.91	0.878049	0.83871	0.876068	0.807874
146	0.92	0.902439	0.827957	0.880342	0.815379
147	0.92	0.902439	0.83871	0.884615	0.821836
148	0.92	0.902439	0.83871	0.884615	0.821836
149	0.92	0.902439	0.83871	0.884615	0.821836
150	0.92	0.902439	0.83871	0.884615	0.821836
151	0.92	0.902439	0.83871	0.884615	0.821836
152	0.92	0.902439	0.827957	0.880342	0.815379
153	0.92	0.902439	0.83871	0.884615	0.821836
154	0.92	0.902439	0.83871	0.884615	0.821836
155	0.92	0.902439	0.83871	0.884615	0.821836
156	0.91	0.902439	0.83871	0.880342	0.815677
157	0.91	0.902439	0.83871	0.880342	0.815677
158	0.91	0.902439	0.83871	0.880342	0.815677
159	0.92	0.902439	0.83871	0.884615	0.821836
160	0.92	0.902439	0.83871	0.884615	0.821836
161	0.91	0.902439	0.83871	0.880342	0.815677
162	0.91	0.926829	0.83871	0.884615	0.822985
163	0.91	0.902439	0.83871	0.880342	0.815677
164	0.92	0.902439	0.83871	0.884615	0.822387
165	0.92	0.902439	0.83871	0.884615	0.821836
166	0.92	0.902439	0.83871	0.884615	0.821836
167	0.92	0.878049	0.827957	0.876068	0.807874
168	0.92	0.878049	0.827957	0.876068	0.807874
169	0.92	0.878049	0.827957	0.876068	0.807874
170	0.92	0.878049	0.827957	0.876068	0.807874
171	0.92	0.878049	0.827957	0.876068	0.807874
172	0.92	0.878049	0.827957	0.876068	0.807874
173	0.91	0.878049	0.827957	0.871795	0.802258
174	0.91	0.878049	0.827957	0.871795	0.802258
175	0.9	0.878049	0.827957	0.867521	0.795548
176	0.91	0.902439	0.827957	0.876068	0.807638
177	0.91	0.902439	0.827957	0.876068	0.807638
178	0.91	0.902439	0.827957	0.876068	0.807638
179	0.9	0.878049	0.827957	0.867521	0.794188
